# Supplementary material for: How are small endohedral silicon clusters stabilized?
Source: Royal Society of Chemistry journal article supplement (doi:10.1039/c2cp42097j), 2012-01-01
Supplement: c2cp42097j.pdf [file c2cp42097j.pdf]

## Supplementary Materials

# How are small endohedral silicon clusters stabilized?

Fabrice Avaltroni, Stephan N. Steinmann, Clémence Corminboeuf\*

Laboratory for Computational Molecular Design, Institut des Sciences et Ingénierie Chimiques, Ecole Polytechnique Fédérale de Lausanne, CH-1015 Lausanne, Switzerland

[clemence.corminboeuf@epfl.ch](mailto:clemence.corminboeuf@epfl.ch)

To be published in *Physical Chemistry Chemical Physics*

This supporting information was prepared on August 22, 2012 and contains 3 pages.

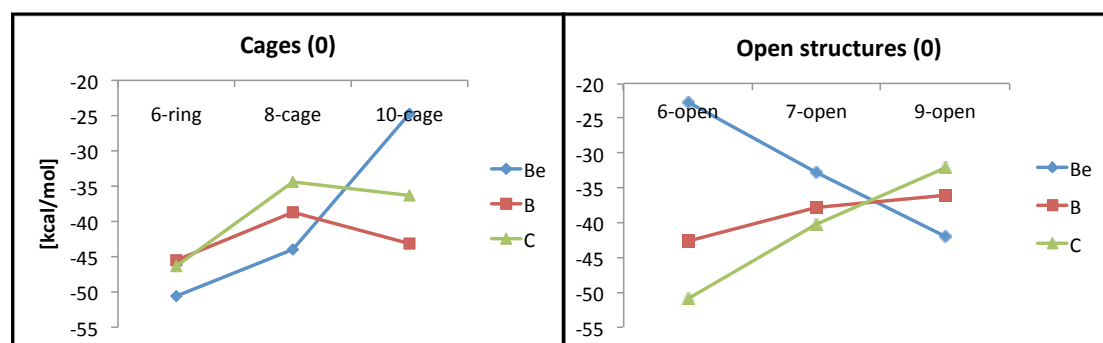

Figure S1:  $\Delta E_{\text{cage relaxation}}$  [kcal/mol] towards the neutral ring/cage and open structures of  $\text{XSi}_n$  ( $n=6-10$ ) after removal of the interstitial atom. Energies are computed at the B3LYP/aug-cc-pVTZ level.

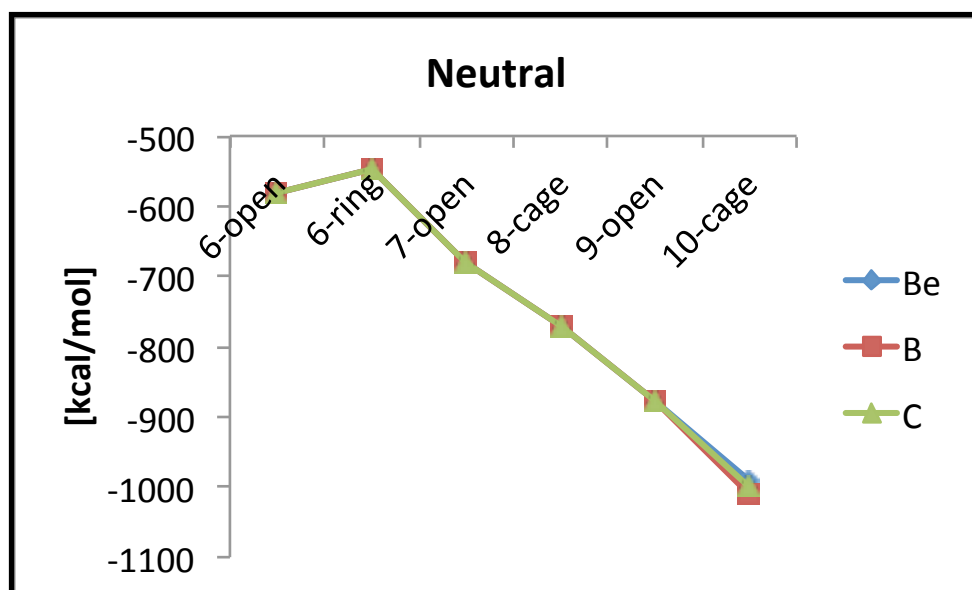

Figure S2:  $\Delta E_{\text{Si}(n) \text{ atomisation}}$  [kcal/mol] of the neutral ring, cages and open structures of  $\text{XSi}_n$  ( $n=6-10$ ). Energies are computed at the B3LYP/aug-cc-pVTZ level.

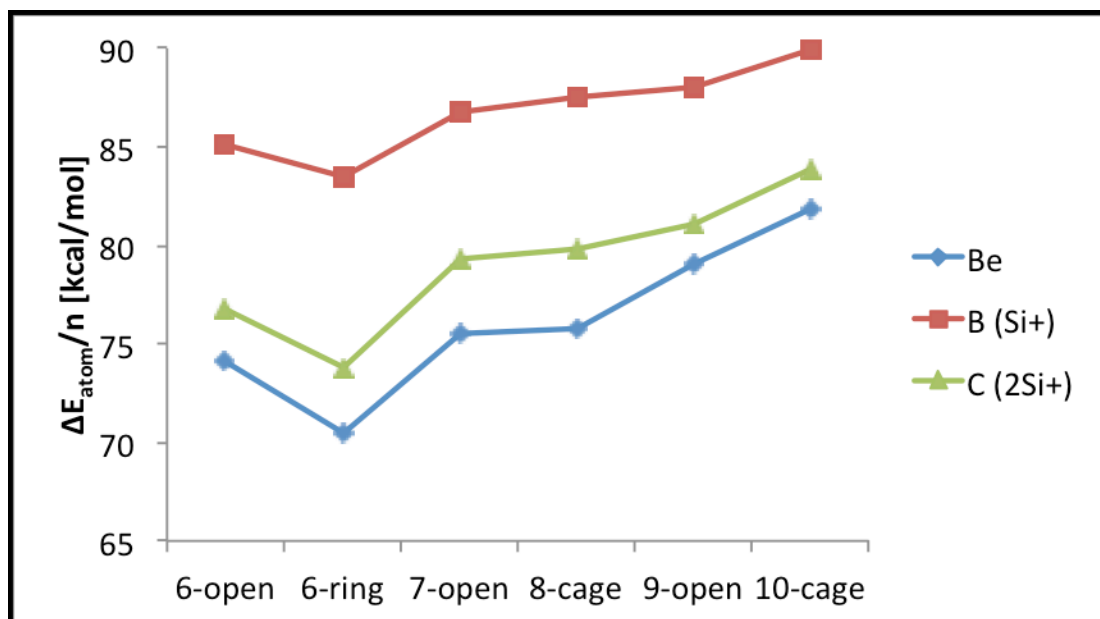

Figure S3: Atomization energy per atom [kcal/mol] of the bordered structures of Fig. 3 and Fig. S4, computed at the CCSD(T)-F12b level. For the charged clusters, the lowest-energy fragmentation produces singly-charged Si atoms through  $\text{XSi}_n^{\text{a}+} \rightarrow \text{X} + \text{aSi}^+ + (\text{n-a})\text{Si}$ .

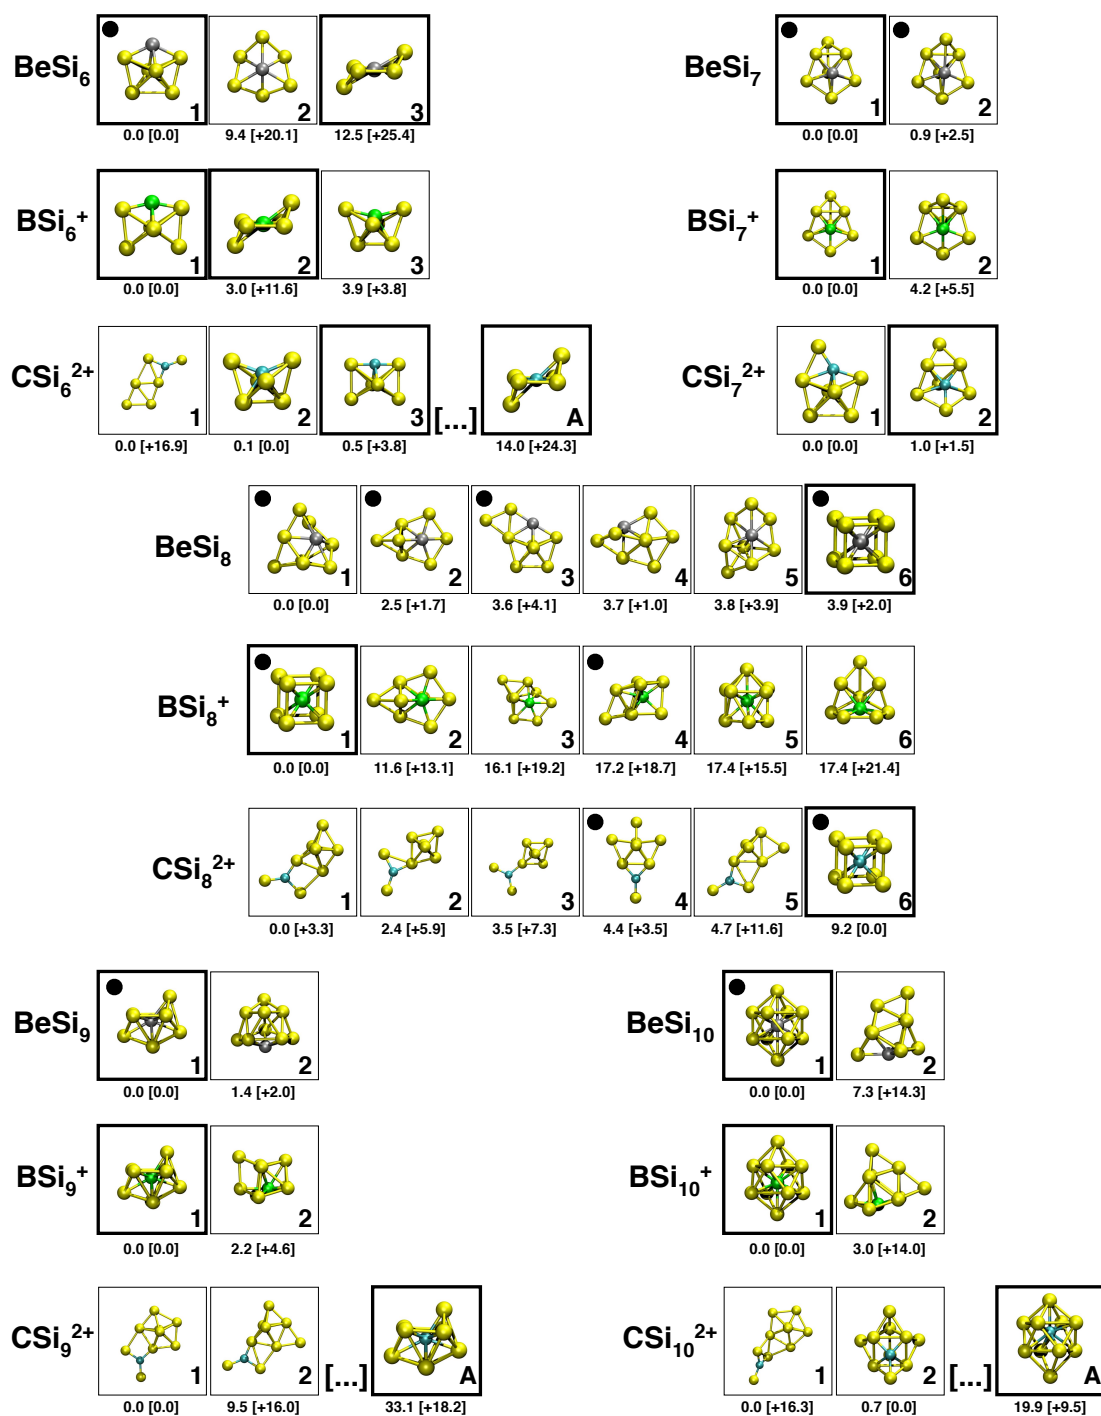

Figure S4: XSi<sub>6-10</sub> low-lying singlet isomers. Values in bold are relative energies in kcal/mol at the CCSD(T)-F12b/VDZ-F12 and B3LYP/aug-cc-pVTZ level (within brackets). Black dots (upper left corner) indicate structures previously described in the literature. Bordered structures are the symmetric isomers further analyzed in this work. T1 diagnostics are given in Table S1.

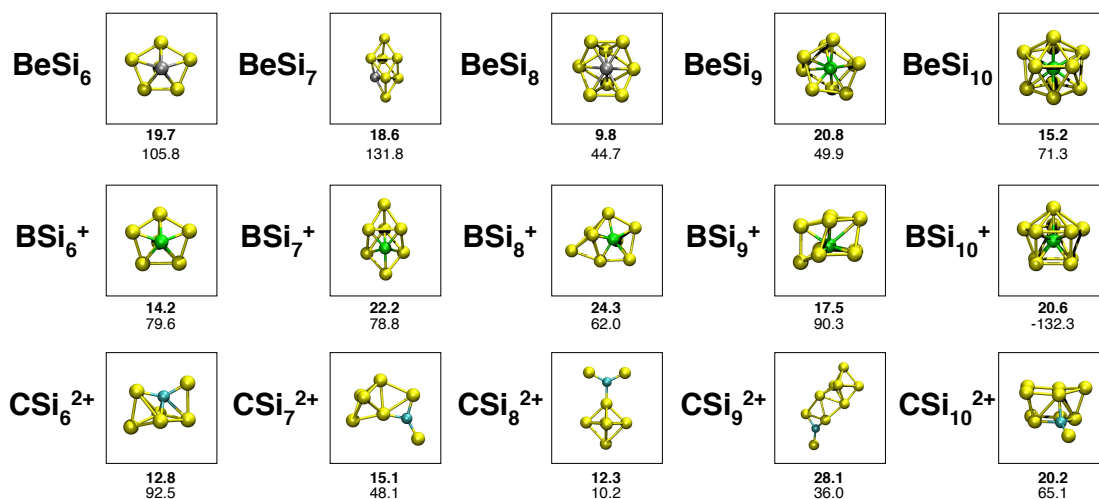

Figure S5: Lowest-lying triplet structures located for  $\text{XSi}_{6-10}$ , along with relative B3LYP/aug-cc-pVTZ energies [kcal/mol] and vibrational frequencies [ $\text{cm}^{-1}$ ] computed at the same level.

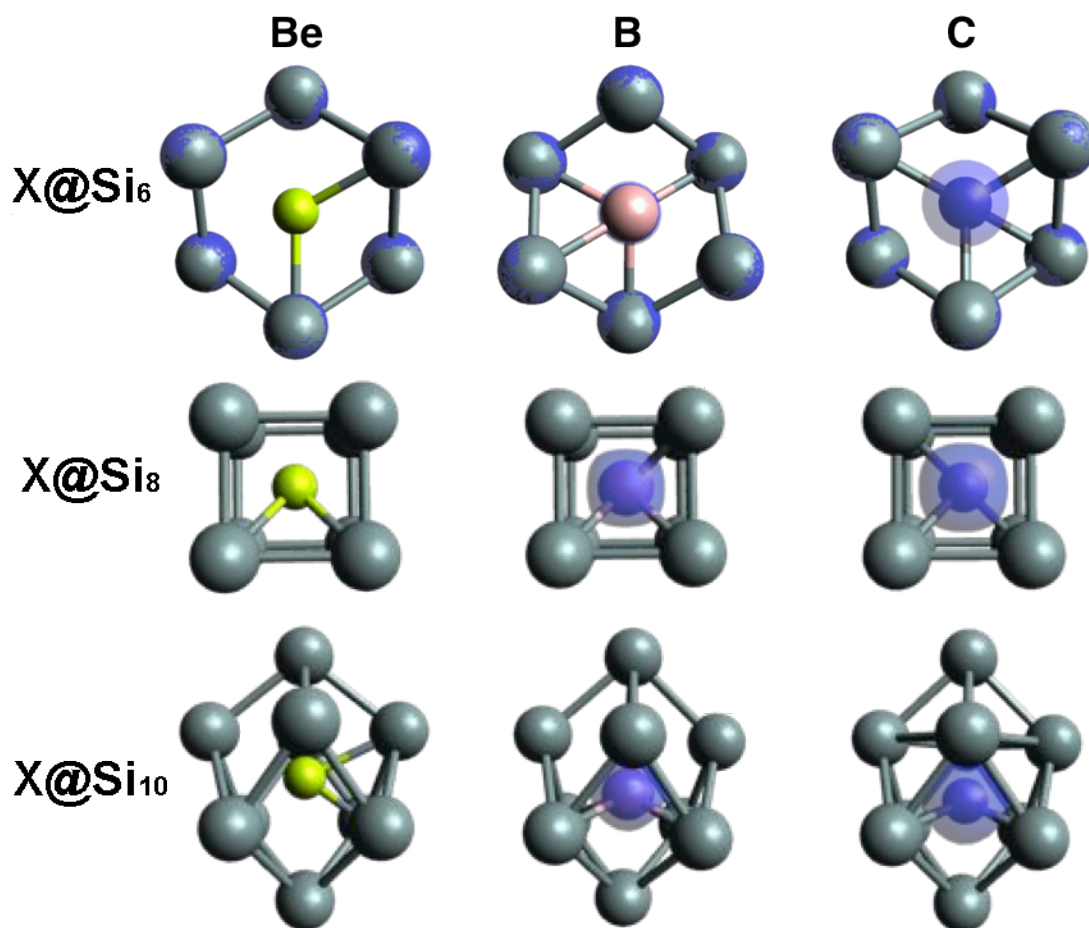

Fig. S6: B3LYP/ aug-cc-pVTZ electron density for the endohedral  $\text{X@Si}_{6-10}$  isomers. Isovalue is 0.08 (0.06 for  $\text{X@Si}_6$ ).

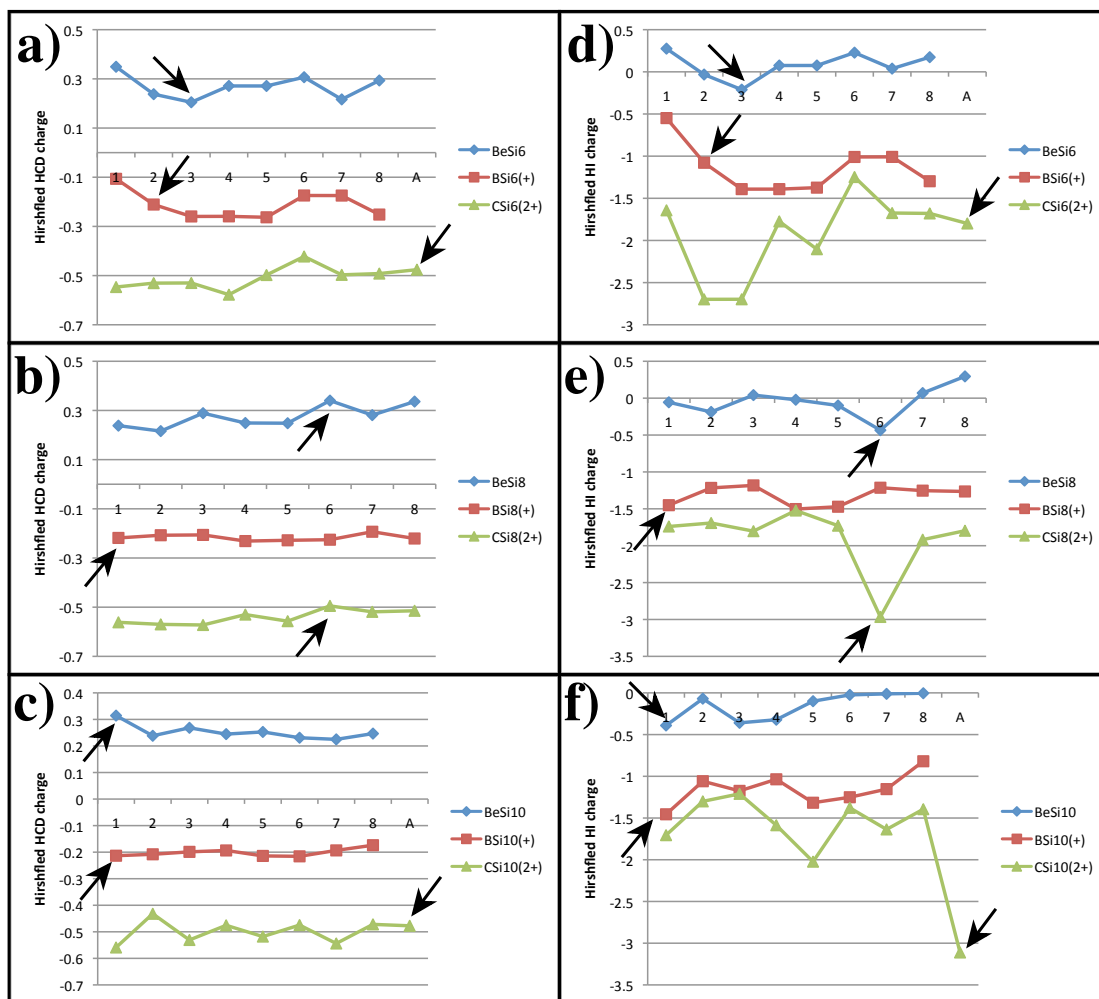

**Figure S7:** Hirshfeld classical dominant (left) and Hirshfeld iterative (right) charges for low-lying isomers shown in Figure S4, a,d)  $XSi_6$ , b, e)  $XSi_8$  and c, f)  $XSi_{10}$ . Arrows refer to the  $X@Si_6$  rings, the  $X@Si_8$  and  $X@Si_{10}$  cages.

**Table S1:** T1 diagnostics for the  $XSi_n$  structures. The number or symbol in parenthesis refers to the molecule label as used in Figure S4.

| n=    | $BeSi_n$ | $BSi_n^+$ | $CSi_n^{2+}$ |
|-------|----------|-----------|--------------|
| 6 (1) | 0.021    | 0.025     | 0.022        |
| 6 (2) | 0.030    | 0.032     | 0.023        |
| 6 (3) | 0.042    | 0.021     | 0.032        |
| 6 (A) |          |           | 0.029        |
| 7 (1) | 0.024    | 0.022     | 0.023        |
| 7 (2) | 0.028    | 0.024     | 0.021        |
| 8 (1) | 0.028    | 0.017     | 0.024        |
| 8 (2) | 0.026    | 0.023     | 0.025        |
| 8 (3) | 0.022    | 0.026     | 0.025        |
| 8 (4) | 0.025    | 0.023     | 0.022        |
| 8 (5) | 0.028    | 0.021     | 0.028        |
| 8 (6) | 0.016    | 0.026     | 0.018        |

|        |       |       |       |
|--------|-------|-------|-------|
| 9 (1)  | 0.029 | 0.022 | 0.023 |
| 9 (2)  | 0.030 | 0.031 | 0.026 |
| 9 (A)  |       |       | 0.019 |
| 10 (1) | 0.024 | 0.021 | 0.024 |
| 10 (2) | 0.027 | 0.025 | 0.028 |
| 10 (A) |       |       | 0.021 |

**Table S2:** Charge of the X atoms in the isomers of  $XSi_{6-10}$  shown in Figure S4 using Mulliken, NPA and Hirshfeld classical (HC), and iterative dominant (HID) schemes, and Voronoi deformation density (VDD). Values were computed at the B3LYP/aug-cc-pVTZ level, except for the VDD charges, which were computed at the B3LYP/ATZ2P level (in ADF 2012).

|         | Compound              | Mulliken | NPA   | HC    | HCD   | HI    | HID   | VDD   |
|---------|-----------------------|----------|-------|-------|-------|-------|-------|-------|
| $XSi_6$ | $BeSi_6$ <b>1</b>     | 1.29     | -0.11 | 0.09  | 0.35  | 0.28  | 0.48  | 0.02  |
|         | $BSi_6^+$ <b>1</b>    | 0.46     | -1.20 | -0.10 | -0.11 | -0.55 | -0.32 | -0.23 |
|         | $CSi_6^{2+}$ <b>3</b> | 0.19     | -1.98 | -0.29 | -0.53 | -2.70 | -2.53 | -0.34 |
| $XSi_7$ | $BeSi_7$ <b>1</b>     | 1.82     | -0.63 | -0.03 | 0.23  | -0.05 | -0.77 | -0.12 |
|         | $BSi_7^+$ <b>1</b>    | 0.85     | -1.72 | -0.17 | -0.20 | -0.96 | -0.51 | -0.34 |
|         | $CSi_7^{2+}$ <b>2</b> | 0.28     | -2.24 | -0.22 | -0.48 | -1.57 | -1.99 | -0.39 |
| $XSi_9$ | $BeSi_9$ <b>1</b>     | 4.25     | -2.16 | -0.16 | 0.27  | -0.37 | -0.79 | -0.31 |
|         | $BSi_9^+$ <b>1</b>    | 3.41     | -2.47 | -0.20 | -0.21 | -1.39 | -1.56 | -0.40 |
|         | $CSi_9^{2+}$ <b>A</b> | 1.79     | -2.92 | -0.20 | -0.47 | -2.95 | -3.05 | -0.41 |

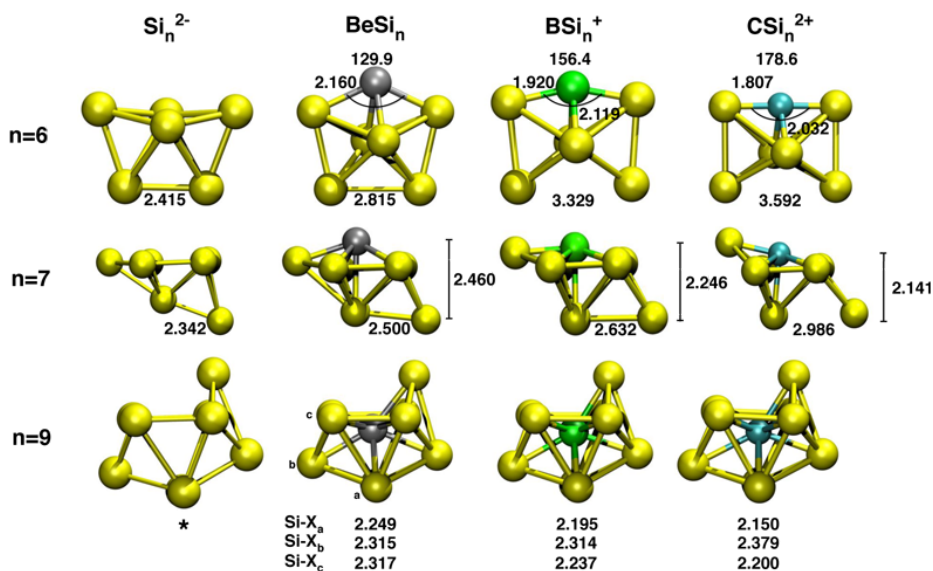

**Figure S8:** Comparison of the bond distances [Å] in open structures  $XSi_6$ ,  $XSi_7$  and  $XSi_9$ , and  $Si_n^{2-}$  bare dianions. The star indicates that the structure is not a stationary point on the PES.

## Cartesian coordinates of the $\text{XSi}_n$ structures.

### **BeSi<sub>6</sub>**

7

SCF Done: -1751.82505968

|    |           |           |           |
|----|-----------|-----------|-----------|
| Be | 0.890366  | 0.420885  | 0.498698  |
| Si | -1.165544 | 0.419764  | -0.164981 |
| Si | 0.739832  | -0.530639 | -1.508265 |
| Si | -1.357703 | -1.782470 | -1.259242 |
| Si | 0.002483  | -1.601906 | 0.776817  |
| Si | 1.218565  | -2.869845 | -0.938096 |
| Si | 2.417474  | -1.092361 | 0.282695  |

7

SCF Done: -1751.81001965

|    |           |           |           |
|----|-----------|-----------|-----------|
| Be | 0.083011  | -0.109351 | -0.940499 |
| Si | -1.340287 | -0.939009 | 0.832179  |
| Si | -2.128988 | 0.008572  | -1.114525 |
| Si | 0.125113  | -2.254793 | -0.363907 |
| Si | 1.886817  | -1.547712 | -1.670160 |
| Si | 0.435712  | -0.475458 | -3.103393 |
| Si | -0.949648 | 1.299889  | -2.614831 |

7

SCF Done: -1751.80516600

|    |           |           |           |
|----|-----------|-----------|-----------|
| Be | -1.867053 | -0.590805 | -0.238098 |
| Si | -0.926019 | 1.135345  | 0.816995  |
| Si | -1.574239 | -2.608459 | 0.668511  |
| Si | -2.157349 | 1.427027  | -1.145734 |
| Si | -1.948824 | -0.488291 | -2.465502 |
| Si | -2.805866 | -2.317820 | -1.294200 |
| Si | -1.782452 | -0.693801 | 1.989361  |

### **BeSi<sub>6</sub> triplet**

7

SCF Done: -1751.79370613

|    |           |           |           |
|----|-----------|-----------|-----------|
| Be | 0.291477  | 0.335521  | -2.094314 |
| Si | 2.057964  | -0.899635 | -1.025077 |
| Si | -0.472803 | -0.912632 | 0.295773  |
| Si | -1.996790 | -0.408579 | -2.065020 |
| Si | -1.171521 | 1.325180  | -0.743624 |
| Si | 1.117026  | 1.048176  | -0.155983 |
| Si | 0.000446  | -1.804373 | -1.972180 |

### **BSi<sub>6</sub><sup>+</sup>**

7

SCF Done: -1761.63996689

|    |           |           |           |
|----|-----------|-----------|-----------|
| B  | -0.730211 | 1.002880  | 0.226842  |
| Si | -1.703047 | -0.869470 | 0.419427  |
| Si | 0.773492  | -0.069037 | 0.753763  |
| Si | -0.298614 | 0.088096  | -1.635163 |
| Si | 0.187383  | -2.076287 | -0.581403 |
| Si | -2.362140 | 1.410254  | -0.699817 |
| Si | -2.588881 | -0.766091 | -1.869052 |

7

SCF Done: -1761.63513716

|    |          |          |           |
|----|----------|----------|-----------|
| B  | 0.205989 | 0.605408 | -0.934568 |
| Si | 1.457805 | 1.501602 | -2.442745 |



Si -1.718279 -0.070110 -1.630388  
Si -0.805338 1.957604 -2.273316  
Si 2.129665 1.282184 -0.238451  
Si 1.217672 -0.745765 0.405042  
Si -1.045653 -0.289881 0.573745

7

SCF Done: -1761.63377689

B 0.329723 -0.134873 0.832450  
Si 1.497184 1.145758 -0.203042  
Si 0.584681 -1.918271 -0.040476  
Si -1.771229 -0.658869 0.715936  
Si -0.052487 -1.300275 2.435083  
Si -0.500925 -0.036317 -1.168320  
Si -0.747104 1.530701 1.106528

### **BSi<sub>6</sub><sup>+</sup> triplet**

7

SCF Done: -1761.61734080

B 0.674208 -0.851529 -0.908867  
Si -1.396885 -0.610737 -1.105750  
Si 1.787126 0.432611 0.254976  
Si -0.018734 1.366809 -1.302963  
Si -0.171488 -0.689846 0.984870  
Si 0.125029 -1.285279 -2.868187  
Si 1.974300 0.054037 -2.224684

### **CSi<sub>6</sub><sup>2+</sup>**

7

SCF Done: -1774.45031766

C 2.653962 1.704959 -0.185064  
Si 1.139563 2.448126 0.600715  
Si -0.588987 1.070376 -1.160270  
Si 0.536668 -0.477718 -2.930745  
Si 4.410849 1.820822 0.069722  
Si -1.871600 -0.114012 -2.660562  
Si 1.682109 0.770288 -1.365227

7

SCF Done: -1774.45019070

C 1.133221 0.776392 0.202879  
Si 2.345874 1.955599 1.178288  
Si -0.885477 0.485901 -0.295488  
Si -0.112685 1.438187 1.751750  
Si 0.520505 2.446673 -0.669492  
Si 0.824652 -0.787879 1.374328  
Si 1.289019 -0.533409 -1.230819

7

SCF Done: -1774.44945414

C 0.658003 0.017528 -0.235589  
Si 1.033472 -0.879700 1.287095  
Si 0.258362 0.942595 -1.735277  
Si -1.107458 2.648883 -0.343194  
Si 0.964430 1.771072 0.743201  
Si -0.336021 0.838057 2.661241  
Si -1.252578 0.271348 0.407424

7

SCF Done: -1774.42798473

C -1.866458 -0.590889 -0.238250  
Si -0.797297 0.977836 0.695083  
Si -1.398547 -2.494341 0.557356

|    |           |           |           |
|----|-----------|-----------|-----------|
| Si | -2.333200 | 1.313147  | -1.034603 |
| Si | -1.746026 | -0.528006 | -2.349390 |
| Si | -2.934748 | -2.160489 | -1.172336 |
| Si | -1.985525 | -0.654063 | 1.873474  |

**CSi<sub>6</sub><sup>2+</sup> triplet**

7

SCF Done: -1774.42997287

|    |           |           |           |
|----|-----------|-----------|-----------|
| C  | -0.488859 | -1.198892 | 1.076174  |
| Si | -1.066543 | 0.747702  | 1.265869  |
| Si | -1.689564 | -2.531344 | 1.622859  |
| Si | -2.512320 | -0.694893 | 0.046462  |
| Si | 1.295548  | -0.724294 | 1.330243  |
| Si | -0.341588 | -0.804875 | -0.919801 |
| Si | 0.884104  | 1.226396  | -0.191601 |

**BeSi<sub>7</sub>**

8

SCF Done: -2041.34840318

|    |           |           |          |
|----|-----------|-----------|----------|
| Be | -0.046407 | 1.009481  | 2.228010 |
| Si | -0.992459 | 0.489559  | 0.017207 |
| Si | -1.924639 | -0.092403 | 2.343231 |
| Si | 0.278216  | 2.717670  | 0.892440 |
| Si | 0.268478  | -1.064493 | 1.633380 |
| Si | -1.997350 | 2.195018  | 1.718524 |
| Si | 1.554406  | 0.620260  | 0.567357 |
| Si | -1.802239 | -1.792426 | 0.640031 |

8

SCF Done: -2041.34704712

|    |           |           |           |
|----|-----------|-----------|-----------|
| Be | 1.419704  | -0.547958 | -0.396520 |
| Si | -0.185051 | 0.973704  | -0.104273 |
| Si | 0.687800  | -2.351360 | -1.571955 |
| Si | -0.153752 | -0.084608 | -2.346733 |
| Si | 1.834577  | 1.984082  | 0.472286  |
| Si | -0.650911 | -1.328979 | 0.157580  |
| Si | 1.880647  | 1.188539  | -1.718312 |
| Si | 2.535774  | -0.997252 | -2.334792 |

**BeSi<sub>7</sub> triplet**

8

SCF Done: -2041.31882792

|    |          |           |           |
|----|----------|-----------|-----------|
| Be | 0.030869 | -1.345215 | -0.012386 |
| Si | 0.537319 | -1.473689 | 2.180250  |
| Si | 2.876646 | -1.053537 | -1.007884 |
| Si | 1.840948 | -2.646058 | 0.534594  |
| Si | 0.647450 | 0.088519  | -1.586295 |
| Si | 2.140165 | -0.938881 | -3.249222 |
| Si | 1.632651 | 0.114129  | 0.744613  |
| Si | 0.838416 | -2.417065 | -1.776717 |

**BSi<sub>7</sub><sup>+</sup>**

8

SCF Done: -2051.17880805

|    |           |           |           |
|----|-----------|-----------|-----------|
| B  | -0.322969 | -0.000959 | 0.678676  |
| Si | 0.609057  | 0.283872  | -1.344657 |
| Si | -1.414918 | 1.505462  | -0.177171 |
| Si | 1.794683  | -0.468096 | 0.943201  |
| Si | 0.854679  | 1.661369  | 0.889602  |
| Si | -0.046457 | -1.993568 | 0.381773  |
| Si | -1.810979 | -0.715781 | -0.751780 |
| Si | 0.317967  | 2.889052  | -1.106849 |

8

SCF Done: -2051.17206617

|    |           |           |           |
|----|-----------|-----------|-----------|
| B  | -0.072837 | 0.755324  | 0.137764  |
| Si | -1.845491 | 1.008528  | -0.977985 |
| Si | 0.270057  | 0.486646  | -1.923972 |
| Si | 1.811432  | 1.620750  | -0.448680 |
| Si | -1.367289 | 1.670261  | 1.530740  |
| Si | -0.384262 | 2.937064  | -0.376959 |
| Si | 0.982681  | 1.471442  | 1.815768  |
| Si | -2.270287 | -0.404977 | 0.863292  |

**BSi<sub>7</sub><sup>+</sup> triplet**

8

SCF Done: -2051.14350305

|    |           |           |           |
|----|-----------|-----------|-----------|
| B  | -0.485583 | -0.336232 | -0.396039 |
| Si | -1.976078 | 0.463106  | 0.693130  |
| Si | 0.738943  | -2.051243 | -0.174690 |
| Si | 0.509399  | 0.115383  | 1.292779  |
| Si | -0.146480 | -1.191855 | -2.302016 |
| Si | -1.280911 | -0.115263 | 3.030626  |
| Si | -1.131181 | -1.897670 | 1.376074  |
| Si | -2.078209 | -1.657658 | -0.852974 |

**CSi<sub>7</sub><sup>2+</sup>**

8

SCF Done: -2063.98839480

|    |           |           |           |
|----|-----------|-----------|-----------|
| C  | 0.350679  | -0.491053 | 0.061289  |
| Si | 1.984667  | -0.603249 | -0.844654 |
| Si | -2.448345 | 0.984305  | -1.486487 |
| Si | -0.083181 | 0.454126  | -1.908221 |
| Si | -0.731077 | 1.154366  | 0.425339  |
| Si | -0.468692 | -0.969217 | 1.805198  |
| Si | -1.428239 | -1.184537 | -0.543165 |
| Si | -2.829587 | 0.010969  | 1.138323  |

8

SCF Done: -2063.98676882

|    |           |           |           |
|----|-----------|-----------|-----------|
| C  | 0.133788  | -0.402555 | 0.043511  |
| Si | 1.283529  | -1.941703 | 2.929654  |
| Si | -1.211991 | -0.967758 | 1.609985  |
| Si | -0.567471 | 1.487496  | 1.003287  |
| Si | 1.210587  | 0.094124  | 1.636207  |
| Si | -1.062779 | -2.123397 | -0.726002 |
| Si | -1.170459 | 0.336997  | -1.127192 |
| Si | 0.900700  | -2.161030 | 0.557451  |

**CSi<sub>7</sub><sup>2+</sup> triplet**

8

SCF Done: -2063.96434798

|    |           |           |           |
|----|-----------|-----------|-----------|
| C  | -1.199162 | -0.514510 | 2.355730  |
| Si | -1.480223 | -1.828219 | 3.511716  |
| Si | -0.143888 | -0.467207 | 0.886753  |
| Si | 1.747512  | 1.013494  | 0.058533  |
| Si | -0.433719 | 1.888347  | -0.110427 |
| Si | -1.797749 | 1.217584  | 2.150928  |
| Si | -0.490982 | 0.045530  | -1.577555 |
| Si | 1.377711  | -1.275417 | -0.717772 |

**BeSi<sub>8</sub>**

9

SCF Done: -2330.86139606

|    |           |           |           |
|----|-----------|-----------|-----------|
| Be | -0.401994 | -0.360378 | -0.672894 |
| Si | 1.997407  | -0.230768 | -0.102973 |
| Si | -1.918577 | 0.912453  | 0.547563  |
| Si | 0.252287  | 0.404295  | 1.315761  |
| Si | -1.819352 | -1.619228 | 0.916910  |
| Si | -2.663693 | -0.639008 | -1.220465 |
| Si | -1.124729 | -2.407150 | -1.449675 |
| Si | 0.817615  | -2.168117 | 0.176749  |
| Si | -0.823313 | -3.792177 | 0.606942  |

9

SCF Done: -2330.85742002

|    |           |           |           |
|----|-----------|-----------|-----------|
| Be | -0.962615 | 0.095848  | 0.968572  |
| Si | -2.623514 | -0.840807 | 2.239567  |
| Si | 0.267877  | 1.621311  | 1.994650  |
| Si | -1.114846 | 3.639103  | 1.937575  |
| Si | -0.949600 | 0.205289  | -1.320288 |
| Si | -2.125534 | -1.529529 | -0.055933 |
| Si | -2.333048 | 1.540203  | 2.160988  |
| Si | -1.318170 | 2.174917  | 0.000368  |
| Si | -3.341051 | 0.693430  | 0.026075  |

9

SCF Done: -2330.85562080

|    |           |           |           |
|----|-----------|-----------|-----------|
| Be | 1.192291  | 1.072370  | 0.262525  |
| Si | -0.891566 | 0.071895  | 0.125248  |
| Si | -0.088221 | 1.249040  | 1.996879  |
| Si | 0.175361  | 1.303392  | -1.834436 |
| Si | -0.955216 | -0.931762 | -2.112364 |
| Si | 1.317691  | -0.369488 | -3.182915 |
| Si | 1.214404  | -0.996157 | -0.833675 |
| Si | 2.592691  | 0.941481  | -1.492524 |
| Si | -2.155594 | 0.356462  | 2.091376  |

9

SCF Done: -2330.85556918

|    |           |           |           |
|----|-----------|-----------|-----------|
| Be | -0.720691 | 0.836527  | -1.349727 |
| Si | -1.021342 | -1.145674 | 1.833445  |
| Si | 0.324360  | -0.861695 | -0.256810 |
| Si | -2.364635 | 2.339307  | -0.583311 |
| Si | -2.224871 | -0.522551 | -0.225860 |
| Si | 1.230343  | 0.283368  | 1.793613  |
| Si | 1.248077  | 1.448479  | -0.354312 |
| Si | -2.877576 | 0.686141  | -2.141704 |
| Si | -0.821291 | 1.221809  | 0.984472  |

9

SCF Done: -2330.85532725

|    |           |           |           |
|----|-----------|-----------|-----------|
| Be | -0.484615 | -0.119005 | 0.404490  |
| Si | -1.211403 | 0.375694  | -1.832117 |
| Si | -1.179105 | 2.165793  | -0.128307 |
| Si | 0.740528  | 1.496447  | 1.222197  |
| Si | 0.370249  | -0.656143 | 2.382658  |
| Si | 0.332020  | 1.470702  | 3.634748  |
| Si | -1.540301 | 1.206257  | 2.186848  |
| Si | -2.528713 | -0.506374 | -0.247637 |
| Si | -2.020062 | -1.226399 | 2.008309  |

9

SCF Done: -2330.85511281

|    |          |          |           |
|----|----------|----------|-----------|
| Be | 1.170819 | 0.345245 | -0.605300 |
| Si | 0.987943 | 0.256434 | 1.549630  |
| Si | 1.325803 | 2.341635 | 0.214365  |

|    |           |           |           |
|----|-----------|-----------|-----------|
| Si | 1.017145  | -1.651970 | -1.424945 |
| Si | -0.417186 | 1.580117  | -1.405196 |
| Si | -0.746894 | -0.508028 | -0.076224 |
| Si | 2.753988  | -0.888387 | 0.202034  |
| Si | 1.342434  | 0.434443  | -2.760254 |
| Si | 3.087012  | 1.196264  | -1.139179 |

### BeSi<sub>8</sub> triplet

9

SCF Done: -2330.84580505

|    |           |           |           |
|----|-----------|-----------|-----------|
| Be | -0.570749 | 0.663235  | 0.693004  |
| Si | -2.628420 | -0.394471 | 0.914355  |
| Si | 1.236298  | -0.740487 | 0.872109  |
| Si | 1.516929  | 1.621643  | 0.347633  |
| Si | -1.969093 | 0.765357  | -1.123747 |
| Si | -0.807864 | -1.533314 | -0.348321 |
| Si | 0.470135  | 0.299898  | -1.487428 |
| Si | -0.472144 | 2.619172  | -0.540113 |
| Si | -0.757214 | -1.014168 | 2.276066  |

### BSi<sub>8</sub><sup>+</sup>

9

SCF Done: -2340.70933880

|    |           |           |           |
|----|-----------|-----------|-----------|
| B  | -0.459238 | 0.814914  | 0.491381  |
| Si | -0.233902 | 2.896732  | 0.094772  |
| Si | 1.445125  | -0.028996 | 0.943108  |
| Si | 0.848298  | 1.084080  | -1.169781 |
| Si | -2.363907 | 1.662067  | 0.043055  |
| Si | -1.764926 | 0.549009  | 2.156470  |
| Si | 0.362348  | 1.783657  | 2.205431  |
| Si | -0.681923 | -1.266728 | 0.895963  |
| Si | -1.279944 | -0.152472 | -1.220012 |

9

SCF Done: -2340.69081127

|    |           |           |           |
|----|-----------|-----------|-----------|
| B  | 0.154464  | -0.504013 | -0.085397 |
| Si | 2.826827  | -2.223138 | -1.581350 |
| Si | -0.994124 | -2.561507 | 0.232730  |
| Si | -1.706151 | -0.204423 | 0.853651  |
| Si | 1.980472  | 0.054942  | -0.904153 |
| Si | 1.495833  | -2.191211 | 0.440507  |
| Si | 0.353495  | -0.775138 | 2.027472  |
| Si | 0.428725  | -1.933061 | -1.759237 |
| Si | -1.389242 | -0.357239 | -1.559248 |

9

SCF Done: -2340.68360431

|    |           |           |           |
|----|-----------|-----------|-----------|
| B  | 1.785774  | -0.741745 | -1.258754 |
| Si | 3.724013  | -0.125024 | -1.307578 |
| Si | 3.121876  | -1.751902 | 0.182530  |
| Si | 1.595842  | -0.013645 | 1.006175  |
| Si | 0.054413  | -1.332997 | -0.299298 |
| Si | 2.074618  | 0.632539  | -2.959383 |
| Si | 0.322975  | -1.042071 | -2.771186 |
| Si | 0.442686  | 1.041479  | -1.103682 |
| Si | -1.625204 | -0.060976 | -1.678521 |

9

SCF Done: -2340.68198496

|   |          |           |          |
|---|----------|-----------|----------|
| B | 0.605830 | -0.630285 | 0.828409 |
|---|----------|-----------|----------|

Si 0.356647 1.449882 1.216079  
Si -1.397471 -0.214670 0.112587  
Si -0.607604 -0.434375 2.565283  
Si 0.567253 -1.208318 -1.147695  
Si 2.351173 0.178291 0.264001  
Si -2.563918 -1.623491 1.723591  
Si -0.445699 -2.494138 0.805542  
Si 1.810633 -1.014988 2.460249

9

SCF Done: -2340.68157168

B -0.298301 0.775462 0.019837  
Si -0.232702 0.342607 -2.071417  
Si -0.875728 -1.419017 -0.312160  
Si 1.512479 -0.325276 -0.255059  
Si 1.281950 2.150113 -0.912253  
Si 0.837146 1.827375 1.484063  
Si -0.275779 -0.423086 1.824029  
Si -2.397980 0.509379 -0.230369  
Si -1.103231 2.611796 -0.800413

9

SCF Done: -2340.68154958

B -1.387724 -1.020586 1.937240  
Si 0.593155 -2.119780 -0.816678  
Si 0.142134 -2.524258 1.871231  
Si -1.604563 -2.218421 -0.023099  
Si 0.330449 -0.272467 0.592720  
Si 0.388309 -0.090576 2.904675  
Si -2.476902 -2.959980 1.994184  
Si -1.724105 0.980152 2.235097  
Si -3.398834 -0.697228 1.702785

### **BSi<sub>8</sub><sup>+</sup> triplet**

9

SCF Done: -2340.67068211

B 0.009838 1.286134 0.415300  
Si -0.251064 2.012779 -1.469558  
Si 1.930203 1.965795 -0.058836  
Si -1.257683 -0.488177 -0.263743  
Si -2.082542 1.849037 0.080947  
Si 1.049802 -0.239889 -1.005078  
Si 1.948327 1.516602 -2.472163  
Si -1.031035 0.488733 2.026783  
Si 1.432593 0.168038 1.497421

### **CSi<sub>8</sub><sup>2+</sup>**

9

SCF Done: -2353.53141822

C -2.901435 -0.934556 0.970480  
Si -2.197653 -0.413477 -0.613096  
Si -0.063958 -0.561636 -1.680432  
Si -0.340126 1.070128 0.147569  
Si -2.103903 1.431214 -1.984441  
Si 0.233211 2.000562 -1.830405  
Si -0.385002 0.580676 -3.771411  
Si -1.955449 0.160802 2.143344  
Si -4.163406 -2.112156 1.340094

9

SCF Done: -2353.52760340

C 2.342224 2.450098 0.242260  
Si 0.090019 -0.784442 -0.686721  
Si 0.937783 3.543670 0.662553  
Si -0.030304 1.103703 -2.629945  
Si -1.072296 1.712804 -0.345093  
Si -1.185434 -0.079186 1.235056  
Si 1.277461 1.230674 -0.595180  
Si 4.088767 2.533367 0.477171  
Si -1.980458 -0.012204 -1.820301

9

SCF Done: -2353.52591537

C -1.717535 1.706110 -0.845671  
Si 1.564860 1.866279 1.436988  
Si 2.603065 -0.315064 1.878306  
Si -3.232340 1.838122 0.065188  
Si 1.812738 -0.046694 -0.380952  
Si -1.431347 2.176568 -2.530502  
Si 0.195941 -0.340599 1.966765  
Si -0.227879 1.015492 0.095527  
Si 0.465580 -1.941385 0.203033

9

SCF Done: -2353.52438327

C 1.048054 -2.105385 0.299615  
Si 2.489094 1.139064 -1.886803  
Si 0.315395 2.785599 -1.134775  
Si -0.289150 -0.845868 0.361530  
Si 0.956119 1.304794 0.584422  
Si 1.299232 -3.779004 0.783922  
Si 0.207003 0.429502 -1.862369  
Si 2.035214 -0.719334 -0.395184  
Si -1.710296 0.911563 -0.519287

9

SCF Done: -2353.52392269

C 0.874586 -3.137698 0.907325  
Si 1.562314 -4.727490 0.598678  
Si -1.219982 2.138061 1.975909  
Si 1.822391 0.601154 0.590101  
Si -0.825380 -2.493671 0.699213  
Si 1.249098 1.874738 2.472601  
Si 1.604492 -1.591294 1.534379  
Si -0.406810 -0.003297 1.532703  
Si 1.150555 -0.246143 3.465792

9

SCF Done: -2353.51678490

C -1.194396 0.333235 0.562815  
Si -0.179557 1.649887 -0.760460  
Si -0.520422 2.036831 1.637737  
Si -1.870041 -1.369783 -0.512868  
Si 0.136760 -0.280379 2.101417  
Si 0.470430 -0.669082 -0.296918  
Si -2.520718 0.949582 -0.977208  
Si -2.202660 -0.986359 1.887105  
Si -2.860333 1.331327 1.422759

### CSi<sub>8</sub><sup>2+</sup> triplet

9

SCF Done: -2353.51187533

C -0.551627 1.413557 0.454224  
Si -1.058149 -2.580205 0.201699

|    |           |           |           |
|----|-----------|-----------|-----------|
| Si | 1.242753  | -2.091727 | 0.997439  |
| Si | -0.460318 | -1.682272 | -2.035215 |
| Si | -1.550308 | 2.342896  | -0.676217 |
| Si | 1.873223  | -1.306093 | -1.273270 |
| Si | -0.048309 | -0.346779 | -0.064162 |
| Si | 0.014899  | 1.997405  | 2.028038  |
| Si | 0.873666  | -3.571339 | -1.017362 |

**BeSi<sub>9</sub>**

10

SCF Done: -2620.40348147

|    |           |           |           |
|----|-----------|-----------|-----------|
| Be | -0.622895 | 1.054124  | 0.610497  |
| Si | -0.096634 | -1.172080 | 0.981016  |
| Si | -2.399244 | -0.333350 | 0.081868  |
| Si | 0.434935  | 2.878243  | 1.393749  |
| Si | -0.259304 | -0.060688 | -1.388381 |
| Si | -1.897383 | 0.406964  | 2.347711  |
| Si | 0.495912  | 0.772646  | 2.617700  |
| Si | 0.246392  | 2.470888  | -1.000674 |
| Si | -2.117277 | 1.903709  | -0.840789 |
| Si | 1.636063  | 0.663442  | 0.271174  |

10

SCF Done: -2620.40128072

|    |           |           |           |
|----|-----------|-----------|-----------|
| Be | -0.250538 | 0.383262  | 0.321850  |
| Si | -0.970675 | -0.392343 | -2.520005 |
| Si | 0.914354  | 0.767352  | -3.398026 |
| Si | 0.036386  | -2.503683 | -1.619456 |
| Si | 0.377625  | 1.734528  | -1.299206 |
| Si | -2.036668 | 1.083543  | -0.996667 |
| Si | -1.633665 | -1.255899 | -0.193490 |
| Si | 1.747706  | -0.675146 | -1.697246 |
| Si | 0.851728  | -1.513244 | 0.557801  |
| Si | 2.058548  | 0.660243  | 0.240526  |

**BeSi<sub>9</sub> triplet**

10

SCF Done: -2620.37040772

|    |           |           |           |
|----|-----------|-----------|-----------|
| Be | 0.792799  | -0.413309 | -0.807831 |
| Si | -1.118992 | -0.152177 | -2.062877 |
| Si | -0.143163 | -2.338644 | -2.172349 |
| Si | 1.832934  | -0.868006 | -2.821301 |
| Si | -0.543899 | -1.907773 | 0.196306  |
| Si | 0.922483  | 1.291447  | -2.319965 |
| Si | 1.872717  | -2.241952 | -0.209197 |
| Si | 1.432604  | 1.645344  | 0.022492  |
| Si | -0.902371 | 0.554038  | 0.254612  |
| Si | 2.998296  | -0.052270 | -0.834620 |

**BSi<sub>9</sub><sup>+</sup>**

10

SCF Done: -2630.22845883

|    |           |           |           |
|----|-----------|-----------|-----------|
| B  | 0.362336  | 0.781628  | 0.040318  |
| Si | -0.933470 | -0.318955 | 1.610131  |
| Si | 0.022135  | 1.248292  | -2.121050 |
| Si | 1.811132  | -0.418318 | -1.308194 |
| Si | 2.184260  | 1.853836  | -0.550039 |
| Si | -0.077055 | 1.935483  | 1.854793  |
| Si | 0.096353  | 3.057068  | -0.287303 |
| Si | 1.335766  | -0.928044 | 1.013573  |
| Si | -1.798366 | 1.314118  | -0.185883 |



Si -0.661083 -0.990926 -0.862356  
10  
SCF Done: -2630.22500986  
B 0.249520 -0.948998 0.176013  
Si -0.448557 -2.653292 -0.732847  
Si -1.943902 -0.489478 -0.678519  
Si -1.908515 1.568791 0.589944  
Si 0.720651 -2.071881 1.829945  
Si 0.039060 -0.627340 -2.016173  
Si 0.336819 1.136175 -0.337089  
Si -1.778411 -1.972018 1.334078  
Si -0.673893 0.141943 2.102292  
Si 1.645029 0.169961 1.500512

**BSi<sub>9</sub><sup>+</sup> triplet**

10  
SCF Done: -2630.20061561  
B -0.620319 0.608573 0.235290  
Si 1.393975 -0.288373 0.312860  
Si -0.665430 -0.394542 2.278875  
Si 0.657923 1.553758 1.713972  
Si -2.514236 0.985866 1.412366  
Si -0.271701 -2.062398 0.609257  
Si -1.937154 1.248651 -1.397557  
Si -0.026956 -0.295122 -1.647981  
Si -2.338406 -0.811938 -0.142920  
Si -1.148941 2.723434 0.395637

**CSi<sub>9</sub><sup>2+</sup>**

10  
SCF Done: -2643.07457409  
C -1.874316 -1.795571 -0.326140  
Si 0.210709 1.452188 0.599499  
Si -0.327439 3.373652 -1.030853  
Si 0.163984 1.095016 -2.126694  
Si -0.518271 -0.583143 -0.508006  
Si -1.790643 -3.537452 -0.097957  
Si -1.897316 1.545365 -0.763282  
Si 2.028749 2.135428 -0.908199  
Si 1.852585 -0.317872 -0.584543  
Si -3.390296 -0.754542 -0.440689

10  
SCF Done: -2643.05940218  
C -0.332006 1.761196 -0.718117  
Si -0.046162 0.188975 0.134797  
Si 0.240644 1.270871 -2.407703  
Si -0.855774 -2.033289 0.223928  
Si 1.711124 -1.222012 0.858985  
Si 0.616057 -3.216970 1.809582  
Si 0.847419 -1.214224 -1.678999  
Si 1.229705 -3.362494 -0.484330  
Si 1.723104 -3.108342 -2.785511  
Si -0.946027 3.337993 -0.248517

10  
SCF Done: -2643.02177847  
C 0.340513 0.776693 0.019638  
Si -0.980947 -0.352467 1.644504  
Si 0.040021 1.253272 -2.107605  
Si 1.841030 -0.454410 -1.356692  
Si 2.148245 1.820495 -0.497025

|    |           |           |           |
|----|-----------|-----------|-----------|
| Si | -0.028278 | 1.899218  | 1.816460  |
| Si | 0.078072  | 3.119051  | -0.306896 |
| Si | 1.331600  | -0.856530 | 1.006992  |
| Si | -1.783726 | 1.319032  | -0.168962 |
| Si | -0.644524 | -0.990171 | -0.846424 |

**CSi<sub>9</sub><sup>2+</sup> triplet**

10

SCF Done: -2643.02983565

|    |           |           |           |
|----|-----------|-----------|-----------|
| C  | -1.974481 | -1.311630 | 3.006749  |
| Si | 1.585346  | 1.463720  | 0.063198  |
| Si | -0.401900 | -1.163646 | 2.043357  |
| Si | 0.035751  | 1.319858  | 1.915697  |
| Si | -0.114033 | 1.286513  | -2.129152 |
| Si | -0.279814 | -0.068633 | -0.257817 |
| Si | -2.037272 | 0.430464  | 3.492976  |
| Si | -1.110153 | 2.301941  | 0.086591  |
| Si | -3.030306 | -2.627137 | 3.511753  |
| Si | 0.679825  | 3.362870  | -1.127665 |

**BeSi<sub>10</sub>**

11

SCF Done: -2909.94622090

|    |           |           |           |
|----|-----------|-----------|-----------|
| Be | -0.074146 | -0.847716 | 0.340139  |
| Si | 0.448033  | -2.371162 | -1.213698 |
| Si | 0.357792  | -0.375869 | 2.485629  |
| Si | 2.039175  | -1.330653 | 0.897902  |
| Si | -0.802153 | 0.161826  | -1.519882 |
| Si | -1.888656 | -1.536907 | 2.048577  |
| Si | 0.789472  | 1.202241  | 0.592138  |
| Si | 0.116338  | -2.902037 | 1.208993  |
| Si | -1.651034 | 0.680089  | 0.776487  |
| Si | -1.892498 | -1.845982 | -0.499649 |
| Si | 1.740317  | -0.157908 | -1.365459 |

11

SCF Done: -2909.93459701

|    |           |           |           |
|----|-----------|-----------|-----------|
| Be | -0.554953 | 1.435134  | -0.400615 |
| Si | -0.616142 | -1.428901 | 3.288955  |
| Si | -1.030967 | -1.883377 | 0.955946  |
| Si | -0.108022 | 2.286950  | 1.582863  |
| Si | -1.740610 | 0.384366  | 2.223078  |
| Si | 1.673363  | 1.229309  | 0.145118  |
| Si | 0.790063  | -0.122329 | 1.872466  |
| Si | -1.054786 | 0.227546  | -2.264070 |
| Si | 0.336915  | -0.789512 | -0.672305 |
| Si | -2.258319 | -0.270146 | -0.312384 |
| Si | -2.467238 | 2.059207  | 0.720326  |

**BeSi<sub>10</sub> triplet**

11

SCF Done: -2909.92204260

|    |           |           |           |
|----|-----------|-----------|-----------|
| Be | -0.024343 | -0.527881 | 0.127197  |
| Si | -2.267141 | -1.135047 | -0.109813 |
| Si | -0.610631 | -2.297016 | 1.298511  |
| Si | 0.818629  | 1.567740  | 0.468555  |
| Si | 1.444613  | 0.035428  | -1.529601 |
| Si | -0.964520 | 0.971651  | -1.318469 |
| Si | -1.569613 | 0.875150  | 1.202347  |
| Si | 2.201376  | -0.588554 | 0.871272  |
| Si | 1.160188  | -2.467315 | -0.407940 |

|    |           |           |           |
|----|-----------|-----------|-----------|
| Si | -0.590011 | -1.522447 | -1.923224 |
| Si | 0.269033  | -0.291680 | 2.430445  |

**BSi<sub>10</sub><sup>+</sup>**

11

SCF Done: -2919.77151569

|    |           |           |           |
|----|-----------|-----------|-----------|
| B  | -0.913609 | -0.362704 | 0.125791  |
| Si | -0.589466 | -0.086646 | -2.001032 |
| Si | 1.650515  | -0.008223 | 1.604811  |
| Si | -0.238370 | -1.764855 | 1.756389  |
| Si | -1.158368 | -2.441701 | -0.442059 |
| Si | -0.750564 | 0.853361  | 2.017012  |
| Si | 1.028723  | -1.283416 | -0.555645 |
| Si | 0.514719  | 1.331992  | -0.294533 |
| Si | -1.942253 | 1.538859  | -0.044929 |
| Si | -2.513504 | -0.814260 | 1.518649  |
| Si | -2.885083 | -0.639094 | -1.007803 |

11

SCF Done: -2919.76673124

|    |           |           |           |
|----|-----------|-----------|-----------|
| B  | 0.851312  | -0.286917 | -0.446180 |
| Si | -0.616659 | -1.509984 | 1.249340  |
| Si | 0.935084  | 0.730559  | 1.274270  |
| Si | -0.113995 | -0.105180 | -2.257671 |
| Si | 0.622698  | -2.252457 | -1.023181 |
| Si | -0.720375 | -2.317165 | -3.038858 |
| Si | -1.419225 | 0.827271  | -0.094826 |
| Si | 1.779441  | -1.668618 | 0.969290  |
| Si | 0.586078  | 1.803188  | -1.026208 |
| Si | -2.874087 | -0.770266 | 0.938708  |
| Si | -1.895979 | -1.578543 | -1.048556 |

**BSi<sub>10</sub><sup>+</sup> triplet**

11

SCF Done: -2919.73867175

|    |           |           |           |
|----|-----------|-----------|-----------|
| B  | -0.265064 | 0.296751  | -0.235033 |
| Si | -1.219402 | 2.414446  | -0.765971 |
| Si | -1.912285 | -0.984377 | -0.849703 |
| Si | 1.687181  | -0.072832 | 0.839981  |
| Si | -2.363004 | 0.826052  | 0.763722  |
| Si | -0.649897 | -0.743025 | 1.714555  |
| Si | 0.040467  | 1.735026  | 1.481256  |
| Si | -0.804040 | 0.550500  | -2.329036 |
| Si | 1.385816  | -0.446788 | -1.780843 |
| Si | 1.231277  | 1.864093  | -0.807492 |
| Si | 0.239024  | -2.030801 | -0.248918 |

**CSi<sub>10</sub><sup>2+</sup>**

11

SCF Done: -2932.60038476

|    |           |           |           |
|----|-----------|-----------|-----------|
| C  | 3.507394  | -0.517092 | 0.554543  |
| Si | 0.134007  | -0.647629 | 0.933555  |
| Si | 5.254453  | -0.402099 | 0.435159  |
| Si | -1.931933 | 0.937110  | -2.136201 |
| Si | -1.162193 | 1.315144  | 0.249494  |
| Si | -3.428679 | 0.449350  | -0.069151 |
| Si | -2.097694 | -0.570567 | 1.838270  |
| Si | 2.480507  | 0.294363  | 1.784007  |
| Si | -1.676316 | -1.166445 | -0.672788 |
| Si | 0.285944  | 0.131439  | -1.470029 |
| Si | 2.141756  | -1.490187 | -0.267699 |

11

SCF Done: -2932.59931123

|    |           |           |           |
|----|-----------|-----------|-----------|
| C  | -0.753174 | -0.328511 | 1.007556  |
| Si | 2.344185  | 1.644771  | 1.279037  |
| Si | -1.120831 | 0.847633  | -0.960286 |
| Si | -0.098487 | -1.511138 | -0.340532 |
| Si | -0.039867 | 1.878500  | 1.131671  |
| Si | 2.040398  | 0.015816  | -0.602217 |
| Si | 0.990992  | -0.471849 | 1.770844  |
| Si | 0.401818  | -0.207204 | -2.486981 |
| Si | -2.253958 | 0.749475  | 1.252385  |
| Si | 2.084147  | -2.185023 | 0.456897  |
| Si | 1.041622  | 2.209619  | -1.168424 |

11

SCF Done: -2932.56980495

|    |           |           |           |
|----|-----------|-----------|-----------|
| C  | -0.984189 | -0.373109 | 0.085526  |
| Si | -0.597691 | -0.088974 | -1.989269 |
| Si | 1.711719  | 0.000470  | 1.638971  |
| Si | -0.225903 | -1.753078 | 1.755671  |
| Si | -1.162835 | -2.428455 | -0.441197 |
| Si | -0.734481 | 0.847563  | 2.014903  |
| Si | 1.033142  | -1.275283 | -0.541216 |
| Si | 0.522623  | 1.323942  | -0.282164 |
| Si | -1.941058 | 1.524453  | -0.046829 |
| Si | -2.508775 | -0.811686 | 1.505272  |
| Si | -2.909811 | -0.642530 | -1.023018 |

### **CSi<sub>10</sub><sup>2+</sup> triplet**

11

SCF Done: -2932.56812218

|    |           |           |           |
|----|-----------|-----------|-----------|
| C  | 1.572433  | 2.269945  | -0.320138 |
| Si | 0.783296  | 2.697798  | 1.471582  |
| Si | -0.656793 | -0.911150 | -0.392577 |
| Si | -1.524009 | 2.633556  | 0.804379  |
| Si | 1.347405  | -1.058411 | 0.868482  |
| Si | -0.161184 | 1.439321  | -0.781320 |
| Si | 2.612876  | 0.948139  | 0.655923  |
| Si | 2.377090  | 3.497238  | -1.320586 |
| Si | 2.595588  | 1.901969  | 2.863093  |
| Si | 1.054286  | 0.034764  | 2.943065  |
| Si | -0.949652 | 0.419272  | 1.575705  |

### **Si<sub>6</sub> GM**

6

SCF Done: -1737.06650869

|    |           |           |           |
|----|-----------|-----------|-----------|
| Si | -0.765755 | 1.682022  | 1.474371  |
| Si | 0.645012  | -0.260519 | 1.112312  |
| Si | 0.876565  | 2.057515  | -0.273796 |
| Si | -0.539929 | 0.259450  | -0.867211 |
| Si | 1.644540  | 1.762419  | 2.010853  |
| Si | 2.543898  | 0.379195  | -0.150532 |

### **Si<sub>6</sub><sup>2-</sup> GM**

6

SCF Done: -1737.08330801

|    |          |           |           |
|----|----------|-----------|-----------|
| Si | 1.002978 | -1.215700 | -0.085901 |
| Si | 0.624202 | 0.262795  | -2.056590 |
| Si | 0.455988 | 2.236109  | -0.543241 |
| Si | 2.467389 | 0.767074  | -0.456432 |
| Si | 0.834872 | 0.757472  | 1.427199  |

Si -1.008423 0.253390 -0.173240

**Si<sub>6</sub><sup>2-</sup> open structure**

6

SCF Done: -1737.06699697

Si 1.792688 1.452691 0.560564  
Si 0.532491 3.415928 -0.003161  
Si 0.018235 -0.128385 1.725089  
Si -0.791546 1.352943 -0.002186  
Si 0.204879 2.472373 2.179091  
Si 1.893160 0.926625 2.900187

**Si<sub>6</sub><sup>2-</sup> D<sub>3d</sub> ring**

6

SCF Done: -1737.01240572

Si -0.876362 1.039108 0.746032  
Si -1.494311 -2.529092 0.604402  
Si -2.237219 1.348322 -1.081886  
Si -1.851427 -0.508456 -2.382871  
Si -2.855574 -2.222232 -1.223611  
Si -1.879856 -0.673649 1.907364

**Si<sub>7</sub> GM**

7

SCF Done: -2026.60167543

Si 0.230366 -0.469492 0.373752  
Si -0.099693 0.946499 2.396634  
Si -0.229496 1.964017 0.107010  
Si 1.480143 0.834834 -1.341329  
Si 1.689615 -0.811714 2.363538  
Si 1.972274 1.290454 1.057190  
Si 2.666076 -0.880829 0.053307

**Si<sub>7</sub><sup>2-</sup> GM**

7

SCF Done: -2026.60575600

Si -1.523324 -0.532495 0.284615  
Si 1.241025 -1.370473 -2.310958  
Si -0.130140 -2.251815 1.213898  
Si -0.676016 0.011913 -1.893760  
Si 1.080126 -0.223403 0.052493  
Si 1.578159 -2.769846 -0.390358  
Si -0.884324 -2.541429 -1.291034

**Si<sub>7</sub><sup>2-</sup> open structure**

7

SCF Done: -2026.57397550

Si 0.438140 0.303867 -0.985103  
Si -1.415131 1.616822 -0.002349  
Si 1.759886 -0.448701 0.962399  
Si 0.707185 1.762554 0.995775  
Si 0.140331 -1.985255 -0.015985  
Si -1.806158 -0.694046 -0.713153  
Si 0.479780 2.607069 -1.407466

**Si<sub>8</sub> GM**

8

SCF Done: -2316.09454434

Si -0.418259 -2.939313 -0.143953  
Si -1.144739 -0.866919 -1.303483

|    |           |           |           |
|----|-----------|-----------|-----------|
| Si | 1.638361  | -2.306578 | 0.963937  |
| Si | 1.442310  | -0.017707 | 2.017851  |
| Si | -0.614394 | -0.650461 | 0.910063  |
| Si | -0.248385 | -2.296804 | 2.646164  |
| Si | 1.272379  | -0.660266 | -0.772169 |
| Si | 2.168762  | -2.090101 | 3.177449  |

### **Si<sub>8</sub><sup>2-</sup> GM**

8

SCF Done: -2316.15315994

|    |           |           |           |
|----|-----------|-----------|-----------|
| Si | 0.434826  | -1.643458 | -0.814367 |
| Si | 0.628742  | 0.601715  | -1.708370 |
| Si | -0.113997 | 2.095247  | 0.050779  |
| Si | 0.435271  | -0.057983 | 1.019678  |
| Si | 2.695281  | -0.842346 | -0.460495 |
| Si | 2.297186  | 1.871293  | 0.167501  |
| Si | 3.001059  | 1.014778  | -1.988663 |
| Si | 2.734388  | 0.105699  | 1.770497  |

### **Si<sub>8</sub><sup>2-</sup> O<sub>h</sub> cubic cage**

8

SCF Done: -2316.11836965

|    |           |           |           |
|----|-----------|-----------|-----------|
| Si | -0.240721 | 2.841858  | 0.104840  |
| Si | 1.395135  | -0.007235 | 0.930925  |
| Si | 0.813985  | 1.076611  | -1.125718 |
| Si | -2.313706 | 1.639868  | 0.055084  |
| Si | -1.730729 | 0.556060  | 2.111417  |
| Si | 0.341296  | 1.758658  | 2.161109  |
| Si | -0.676213 | -1.211596 | 0.884070  |
| Si | -1.257877 | -0.126875 | -1.172720 |

### **Si<sub>9</sub> GM**

9

SCF Done: -2605.62989214

|    |           |           |           |
|----|-----------|-----------|-----------|
| Si | -0.761539 | -0.312153 | -1.333548 |
| Si | -0.130745 | 3.533524  | -1.192358 |
| Si | 0.600100  | 1.500802  | -2.326411 |
| Si | 1.393918  | -0.030399 | 0.112982  |
| Si | -0.699467 | 1.700611  | 0.220977  |
| Si | 1.714103  | 2.668403  | 0.043004  |
| Si | 0.933308  | 1.454791  | 1.938178  |
| Si | 1.530577  | -0.780602 | -2.122780 |
| Si | 2.946061  | 1.173985  | -1.606059 |

### **Si<sub>9</sub><sup>2-</sup> GM**

9

SCF Done: -2605.68500237

|    |           |           |           |
|----|-----------|-----------|-----------|
| Si | -0.031975 | 0.189541  | 1.565696  |
| Si | -1.127316 | -1.807580 | 2.944803  |
| Si | -0.972794 | -1.949927 | 0.291367  |
| Si | -1.469287 | 0.569924  | 3.545591  |
| Si | -1.229290 | 0.347251  | -0.596076 |
| Si | -2.368254 | 1.335172  | 1.368460  |
| Si | -3.309905 | -0.804350 | 0.093956  |
| Si | -2.938444 | -2.768045 | 1.556140  |
| Si | -3.464081 | -0.661334 | 2.747211  |

### **Si<sub>10</sub> GM**

10

SCF Done: -2895.17393335

|    |           |           |           |
|----|-----------|-----------|-----------|
| Si | -1.357914 | -0.498061 | 0.837318  |
| Si | 0.681105  | -2.007283 | 1.204828  |
| Si | 1.936039  | 1.138266  | -1.780355 |
| Si | 0.013941  | 1.215031  | -0.416606 |
| Si | 0.615711  | -0.759731 | -2.246514 |
| Si | 1.693282  | -2.610272 | -1.015714 |
| Si | 0.768977  | 0.432316  | 1.800226  |
| Si | -1.684472 | -0.109497 | -1.624810 |
| Si | -0.799633 | -2.333665 | -0.861398 |
| Si | 2.208410  | -0.409263 | -0.021942 |

**Si<sub>10</sub> D<sub>4d</sub>**

10

SCF Done: -2895.14261999

|    |           |           |           |
|----|-----------|-----------|-----------|
| Si | -1.124416 | -0.913938 | -1.429515 |
| Si | 1.814570  | 0.088579  | 1.379458  |
| Si | 2.544843  | -0.724334 | -0.744054 |
| Si | 0.551027  | 2.068984  | 0.737500  |
| Si | 2.183802  | 1.620082  | -1.013406 |
| Si | 0.997560  | -0.490864 | -2.547340 |
| Si | 0.628838  | -2.021050 | -0.152074 |
| Si | -1.426961 | 1.103415  | -0.187937 |
| Si | -0.024893 | 1.659964  | -2.038458 |
| Si | -0.548293 | -0.503060 | 1.345531  |

**Si<sub>10</sub><sup>2-</sup> GM**

10

SCF Done: -2895.23465641

|    |           |           |           |
|----|-----------|-----------|-----------|
| Si | -0.617458 | -0.103660 | -1.871073 |
| Si | 1.544162  | -0.023244 | 1.541947  |
| Si | -0.223288 | -1.772961 | 1.774450  |
| Si | -1.151280 | -2.312081 | -0.409638 |
| Si | -0.740030 | 0.864315  | 2.037587  |
| Si | 1.052606  | -1.290030 | -0.555974 |
| Si | 0.535054  | 1.346462  | -0.291556 |
| Si | -1.885088 | 1.417291  | -0.038447 |
| Si | -2.420875 | -0.786829 | 1.425622  |
| Si | -2.906875 | -0.642840 | -1.021793 |
